# Supplementary material for: Experimental warming during incubation improves cold tolerance of blue tit (Cyanistes caeruleus) chicks
Source: Oxford University Press journal article supplement (doi:10.1242/jeb.243933), 2022-04-26
Supplement: jeb243933supp.pdf [file jeb243933supp.pdf]

**Table S1. Output table for Linear mixed models (LMMs), describing the effect of****heating on female Blue Tit incubation behaviour.** The table shows test statistics(Likelihood Ratio, LR), degrees of freedom, *P*-values and estimates for models describing

number of on and off bouts, bout duration and percentage of time spent incubating during the incubation period.

| <b>Model</b>                                       | <b>Estimate<br/>(s.e.m.)</b> | <b>LR</b> | <b>d.f.</b> | <b><i>P</i></b> |
|----------------------------------------------------|------------------------------|-----------|-------------|-----------------|
| <b><i>Number of on bouts</i></b>                   |                              |           |             |                 |
| <b>Final model:</b>                                |                              |           |             |                 |
| Treatment                                          |                              | 2.69      | 1           | 0.101           |
| <b><i>Number of off bouts</i></b>                  |                              |           |             |                 |
| <b>Final model:</b>                                |                              |           |             |                 |
| Treatment                                          |                              | 2.69      | 1           | 0.101           |
| <b><i>On bout duration (minutes)</i></b>           |                              |           |             |                 |
| <b>Final model:</b>                                |                              |           |             |                 |
| Treatment:                                         |                              | 4.29      | 1           | 0.038           |
| Heated                                             | 47.4 (1.8)                   |           |             |                 |
| Unheated                                           | 42.5 (1.6)                   |           |             |                 |
| <b><i>Off bout duration (minutes)</i></b>          |                              |           |             |                 |
| <b>Final model:</b>                                |                              |           |             |                 |
| Treatment:                                         |                              | 4.53      | 1           | 0.033           |
| Heated                                             | 6.6 (0.3)                    |           |             |                 |
| Unheated                                           | 5.7 (0.3)                    |           |             |                 |
| <b><i>Percentage of time spent on the nest</i></b> |                              |           |             |                 |
| <b>Final model:</b>                                |                              |           |             |                 |
| Treatment                                          |                              | 0.03      | 1           | 0.867           |
